# Supplementary material for: Well-defined SiO2-coated Fe2Co nanoparticles prepared by reduction with CaH2
Source: Royal Society of Chemistry journal article supplement (doi:10.1039/c5ra20306f), 2015-01-01
Supplement: c5ra20306f1.pdf [file c5ra20306f1.pdf]

**Electric Supplementary Information**

Well-defined SiO<sub>2</sub>-coated Fe<sub>2</sub>Co nanoparticles prepared by reduction  
with CaH<sub>2</sub>

S. Yamamoto\* and M. Tsujimoto

*Institute for Integrated Cell-Material Sciences, Kyoto University, Yoshida Ushinomiya-  
cho, Sakyo-ku, Kyoto, Kyoto 606-8501, Japan*

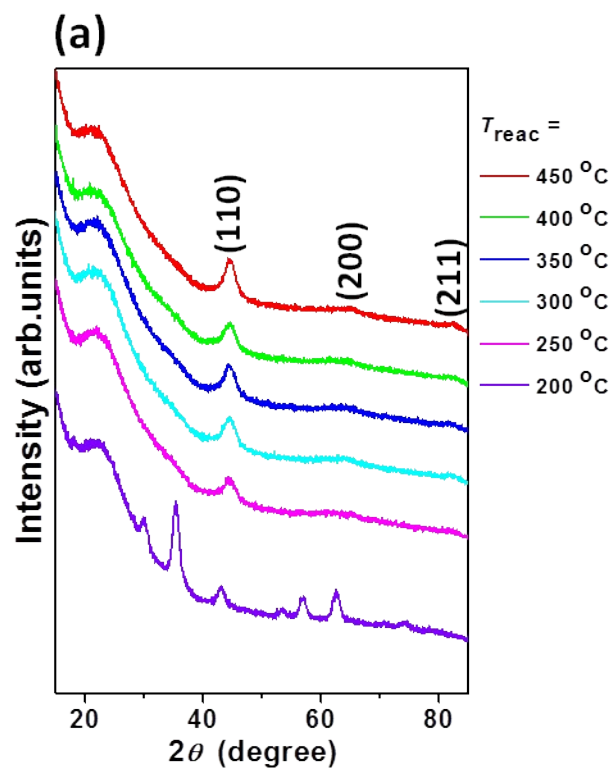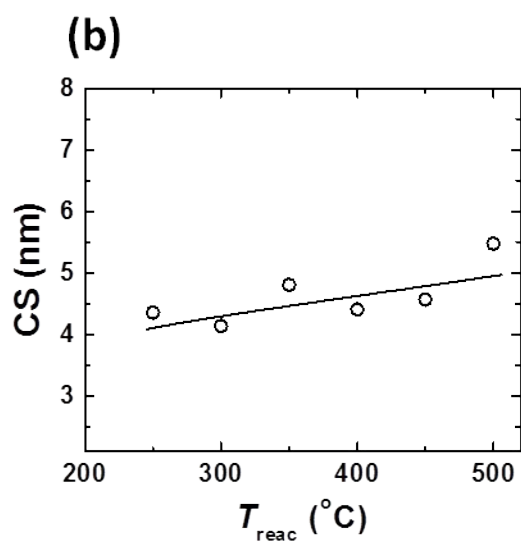

**Figure S1.** (a) XRD patterns and (b) crystallite sizes (CSs) as a function of the reaction temperature ( $T_{\text{reac}}$ ). Reaction time was 12 hrs. The solid line in panel (b) is a guide to eye.

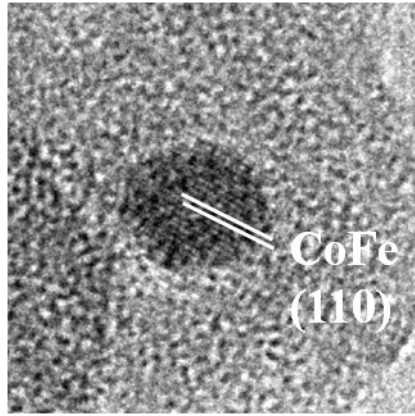

**Figure S2.** Enlarged image of Figure 3(b).

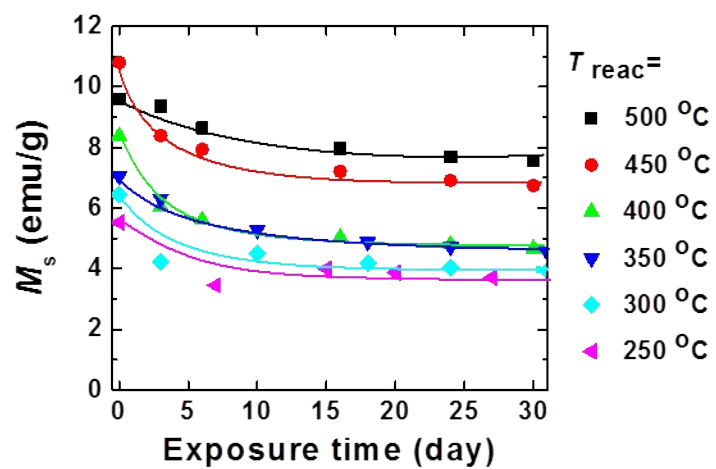

**Figure S3.** Time evolution of  $M_s$  of the samples prepared at different reaction temperatures ( $T_{\text{reac}}$ ) for 12 hrs exposed to air at room temperature.

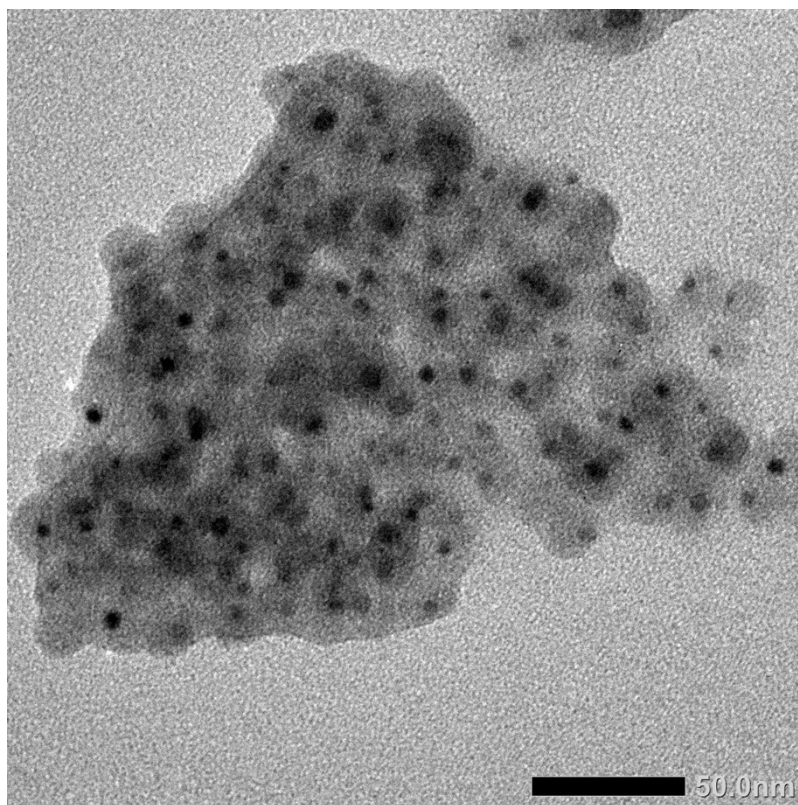

**Figure S4.** Low magnification TEM image of the sample reduced at 500 °C for 12 hr in a stream of H<sub>2</sub>. The nanoparticles heavily sintered to lose their pristine shape.
